# Supplementary material for: A density functional theory insight towards the rational design of ionic liquids for SO2capture
Source: Royal Society of Chemistry journal article supplement (doi:10.1039/c5cp00076a), 2015-01-01
Supplement: c5cp00076a1.pdf [file c5cp00076a1.pdf]

## Towards Rational Design of Ionic Liquids for SO<sub>2</sub> capture: A DFT Insight

Gregorio García,<sup>a</sup> Mert Atilhan,<sup>b</sup> Santiago Aparicio<sup>\*a</sup>

<sup>a</sup> Department of Chemistry, University of Burgos, 09001 Burgos, Spain. <sup>b</sup> Department of Chemical Engineering, Qatar University, P.O. Box 2713, Doha, Qatar

\*Corresponding author: e-mail: [sapar@ubu.es](mailto:sapar@ubu.es)

### Supplementary Material

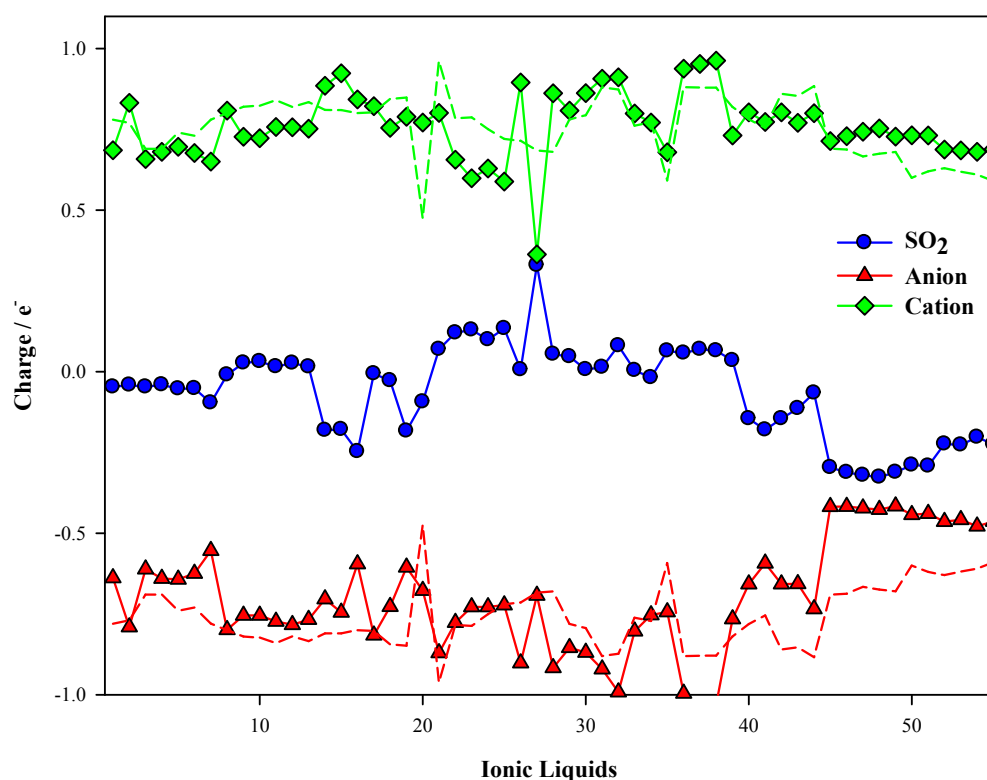

**Figure 1S.** Computed charge over SO<sub>2</sub> (blue), cation (green) and anion (red) according Mulliken scheme. Dotted lines correspond to ion charge for isolated ILs.
