# Supplementary material for: A density functional theory insight towards the rational design of ionic liquids for SO2capture
Source: Royal Society of Chemistry journal article supplement (doi:10.1039/c5cp00076a), 2015-01-01
Supplement: c5cp00076a2.xlsx [file c5cp00076a2.xlsx]

## Sheet: Hoja1
	T=303 K
SO2	H / bar	# ANION
		1	2	3	4	5	6	7	8	9	10	11	12	13	14	15	16	17	18	19	20	21	22	23	24	25	26	27	28	29	30	31	32	33	34	35	36	37	38	39	40	41	42	43	44	45	46	47	48
	# CATION	2-(2-methoxyethoxy)ethylsulfate	acetate	asf6	bcl4	bclf3	benzoate	bf4	bis(2,4,4-trimethylpentyl)phosphinate	bisbiphenyldiolatoborate	bismalonatoborate	bisoxalatoborate	bis-pentafluoroethyl-phosphinate	bis(pentafluoroethylsulfonyl)amide	bissalicylatoborate	bis(trifluoromethyl)imide	bis(trifluoromethylsulfonyl)methane	br	butylsulfate	cl	clo4	decanoate	dibutylphosphate	dicyanamide	diethylphosphate	dihydrogen-phosphate	dimethylphosphate	ethoxyethylsulfate	ethylsulfate	heptafluorobutanoate	hydrogensulfate	i3	i	imidodiphosphorylfluoride	methanesulfonate	methoxyethylsulfate	methylsulfate	no3	octylsulfate	perfluorobutanesulfonate	pf6	salicylate	sbf6	tetracyanoborate	tf2n	thiocyanate	toluene-4-sulfonate	tricyanomethane	trifluoroacetate
1	1-(1,1-difluoroethyl)-3-(trifluoromethyl)imidazolium	5.3328	7.0756	3.6915	2.8038	5.264	5.0606	6.6525	6.4538	2.3329	6.2972	5.8933	4.7375	4.1096	3.499	3.5832	4.708	7.4528	6.5608	6.2084	8.4894	7.1083	6.3609	6.7433	6.6786	13.0266	6.8813	6.0256	7.1461	5.6344	13.1921	4.6722	8.7376	5.4363	7.6277	6.252	7.5966	9.4528	5.7866	5.3977	4.1839	5.0695	3.3239	4.0845	4.6989	8.4263	5.2022	5.0907	6.5513
2	1,1-dimethyl-pyrrolidinium	3.55356	2.48027	3.66107	3.66059	3.768	2.95329	3.11092	4.94802	2.16688	4.81133	5.78413	3.29169	3.34715	3.08539	3.38729	3.77495	1.0852	4.33472	0.975499	4.65288	4.9061	4.44942	3.07081	4.03366	3.8994	3.33234	3.94667	3.8524	3.41514	4.38189	4.71039	1.73022	4.1505	2.55455	3.69137	3.40133	2.62867	4.368	3.55192	3.75904	3.57356	3.3967	3.16792	3.76161	2.79212	3.24553	3.41119	3.45207
3	1,1-dipropyl-pyrrolidinium	2.7519	2.59147	2.44258	2.63238	2.57789	2.38415	2.48666	3.63466	2.01274	3.5415	3.9218	2.89578	3.09061	2.56276	2.46165	3.16957	1.70061	3.10652	1.77032	3.60374	3.3424	3.10971	2.34311	2.9068	4.73906	2.70545	2.949	2.96361	2.72906	4.109	3.45905	2.27952	3.11444	2.57947	2.8726	2.90575	2.90002	3.23576	2.90498	2.4652	2.70712	2.43184	2.32183	3.16873	2.47396	2.49993	2.35755	2.75094
4	1-[2-[2-(2-methoxyethoxy)ethoxy]ethyl]pyridinium	3.56603	4.35865	2.7432	3.06924	3.206	3.68529	3.28292	4.80502	2.36332	4.29552	4.48899	3.19557	3.13298	3.12291	2.82934	3.41276	3.48036	4.1025	3.43657	4.50691	4.78719	4.25566	3.92118	4.20619	6.51358	4.09885	3.86473	4.09535	3.40735	5.56828	4.00914	3.76027	3.63968	3.99602	3.84236	4.1022	4.37518	4.02227	3.28928	2.84025	3.80189	2.67359	3.38619	3.40213	4.01681	3.5238	3.64264	3.76335
5	1,2,3,4,5-pentamethylimidazolium	2.28375	1.57455	2.02675	2.48865	2.05248	1.81268	1.75725	2.99355	1.93543	3.0995	3.67175	2.36292	2.75997	2.3912	2.09991	2.79405	0.972762	2.56259	0.879069	2.83511	2.64232	2.5624	1.99387	2.23571	2.93504	1.93249	2.42987	2.29539	2.13009	2.87582	3.54775	1.40229	2.66499	1.68828	2.28542	2.14348	1.89284	2.81855	2.43692	2.0038	2.24099	2.03841	2.49701	2.83338	1.9244	2.04174	2.33192	2.00728
6	1,2,3-trimethylimidazolium	3.24905	2.37437	2.82922	3.1883	3.15541	2.83598	2.70397	4.60648	2.17837	4.42948	5.25242	2.86761	3.02184	3.02664	2.72793	3.34012	1.13569	3.89263	1.01142	4.20665	4.43179	4.03768	3.08057	3.64222	3.75444	3.06352	3.58162	3.50222	2.94723	4.13085	4.43261	1.72192	3.55001	2.40971	3.36236	3.15053	2.57845	3.99005	3.10241	2.93795	3.39108	2.64385	3.4025	3.34737	2.75707	3.05787	3.50698	3.01453
7	1,2-diethyl-3-methylimidazolium	2.99092	2.92502	2.28387	2.62695	2.61126	2.81229	2.51514	4.34141	2.12549	3.87687	4.27015	2.83522	2.94327	2.8054	2.34357	3.11317	1.84217	3.47383	1.77363	3.81436	4.06072	3.63268	2.91466	3.38129	4.98285	3.08197	3.25063	3.28817	2.83418	4.48863	3.65424	2.3534	3.16688	2.77924	3.13638	3.16803	3.10506	3.58082	2.92084	2.35327	3.12618	2.22768	2.8549	3.11118	2.88805	2.84201	2.94634	2.91942
8	1,2-diethyl-4-fluoropyrazolium	3.99079	4.46836	2.71254	2.83062	3.55776	3.99833	3.70485	5.77691	2.33376	5.05555	5.21479	3.42751	3.23849	3.3076	2.70433	3.61516	3.14692	4.79264	2.84324	5.47028	5.73368	5.00941	4.50809	4.86873	7.44856	4.57534	4.42544	4.74736	3.75796	7.00909	4.01288	3.78453	3.92335	4.25301	4.37116	4.68338	4.85579	4.63515	3.67221	2.93396	4.24517	2.5261	3.53199	3.58207	4.60036	3.94191	4.04562	4.12241
9	1,2-dimethyl-3-(phenylmethyl)imidazolium	3.05987	3.18104	2.23587	2.47764	2.70672	2.92579	2.77268	4.18308	2.06148	3.81005	4.02997	2.58678	2.63581	2.7231	2.23125	2.83489	2.20408	3.46763	2.16822	3.89245	4.01971	3.64514	3.01675	3.48744	4.99393	3.28096	3.28929	3.39755	2.71222	4.62477	3.32057	2.70936	2.94245	3.06255	3.23622	3.35667	3.40806	3.48397	2.71587	2.35306	3.12315	2.13188	2.74986	2.82512	3.0925	2.93602	2.90169	2.97114
10	1-(2-ethoxyethyl)-1-methylpyrrolidinium	3.31844	3.60107	2.75165	2.88766	3.12261	3.10906	3.14853	4.54598	2.14269	4.1778	4.48479	3.16075	3.18953	2.86178	2.74034	3.40448	2.3989	3.8441	2.44639	4.42592	4.43666	3.95952	3.10776	3.8265	5.96624	3.60535	3.61	3.75462	3.22294	5.29764	3.74426	3.01718	3.5257	3.39349	3.54532	3.69856	3.79528	3.83624	3.24301	2.84755	3.35146	2.66696	2.70713	3.38848	3.27983	3.11673	2.9166	3.45092
11	1-(2-hydroxyethyl)-3-methylimidazolium	5.65703	5.54862	4.79829	4.38584	7.14567	5.36653	7.31543	6.84018	2.79071	7.76902	8.41596	4.30743	3.93282	4.34464	4.19229	4.80111	3.4409	7.22879	2.9349	10.3067	7.36091	6.75717	7.21513	6.90593	9.02484	6.49356	6.54475	7.40882	5.06201	10.9021	5.57923	5.00992	5.79865	5.88192	6.54122	7.29046	7.04031	6.37894	4.88225	5.56508	6.12311	4.05459	5.25845	4.73054	7.16307	5.6552	6.51128	6.36391
12	1-(2-methoxyethyl)-1-methylpyrrolidinium	4.04606	5.37499	2.58615	2.86756	3.44416	4.29944	3.72226	5.93639	2.38557	5.09767	5.09678	3.32449	3.17542	3.37425	2.61813	3.53038	3.94204	4.8868	3.75007	5.43314	6.00253	5.16104	4.61453	5.16769	8.66926	4.8666	4.44603	4.9242	3.70536	7.48079	3.93517	4.45667	3.77246	4.98986	4.47478	5.04249	5.40225	4.68908	3.54589	2.78746	4.34031	2.4324	3.54988	3.49344	4.80401	4.08836	4.04553	4.19005
13	1-(2-methoxyethyl)-3-methylimidazolium	3.9107	4.20851	2.91295	3.10484	3.7034	3.88247	3.77827	5.47171	2.3646	5.09845	5.37076	3.29336	3.17269	3.33936	2.85696	3.56612	2.81102	4.72786	2.61428	5.4606	5.46917	4.86245	4.27849	4.73748	6.81452	4.31995	4.31935	4.65745	3.61994	6.59201	4.14855	3.52375	3.89401	4.06248	4.26335	4.56992	4.59091	4.55855	3.52563	3.12926	4.1945	2.70779	3.54035	3.54353	4.31802	3.91124	3.97922	4.05137
14	1-(3,3,4,4,5,5,6,6,6-nonafluorohexyl)-3-methylimidazolium	4.13588	5.18859	2.52563	2.24537	3.19305	3.94734	3.87948	5.35615	2.09046	4.35891	4.02102	3.677	3.32071	2.91697	2.60549	3.57866	4.83474	4.70419	4.77337	4.6754	5.54956	5.08209	4.06114	5.08835	7.95013	4.98072	4.42311	4.84225	4.10461	6.98184	3.30314	5.05986	3.77108	5.30298	4.47506	4.97042	5.52697	4.5058	3.99087	2.72115	3.81093	2.43513	2.82088	3.54856	4.52586	4.02278	3.30624	4.31732
15	1,3-dibutoxy-2-methylimidazolium	3.22741	3.74802	2.48802	2.77071	2.79721	3.29808	2.84144	4.42757	2.39487	3.90525	4.07973	3.3368	3.27264	3.01723	2.67718	3.43545	2.96959	3.64114	2.95516	4.00637	4.10748	3.69953	3.39308	3.62477	6.28552	3.49537	3.43542	3.62084	3.3467	4.95775	3.5926	3.31146	3.48069	3.55233	3.43136	3.66845	3.9124	3.70666	3.283	2.54175	3.49979	2.48257	3.02761	3.40908	3.47897	3.15114	3.19703	3.48316
16	1,3-diethyl-4-methylimidazolium	2.95428	2.96545	2.29919	2.6337	2.62417	2.8083	2.53725	4.28403	2.19002	3.88821	4.27189	2.96935	3.01758	2.85282	2.40441	3.18603	1.95503	3.45622	1.88322	3.85785	3.92648	3.55679	2.96534	3.32157	5.41021	2.99269	3.19173	3.28514	2.94804	4.61751	3.64724	2.48221	3.23658	2.84952	3.08452	3.18522	3.21862	3.56148	3.00127	2.36483	3.17226	2.25246	2.86042	3.18286	2.97979	2.8519	2.96416	3.01175
17	1,3-diethylimidazolium	3.6611	4.16092	2.64369	2.89817	3.31693	3.73848	3.37917	5.47206	2.34284	4.80823	5.09401	3.32621	3.18355	3.26315	2.6707	3.4993	2.7576	4.42988	2.63023	5.01935	5.30413	4.63513	3.97977	4.45966	7.13728	4.07029	4.013	4.31386	3.5615	6.35729	3.97576	3.38898	3.7602	3.903	3.92257	4.28185	4.39077	4.35931	3.46466	2.81436	4.02809	2.49722	3.34965	3.48378	4.01498	3.64377	3.71422	3.86467
18	1-(3-methoxypropyl)-1-methylpiperidinium	3.0766	3.1452	2.64805	2.82428	2.88951	2.87943	2.8335	4.21525	2.13291	3.92462	4.20696	3.00679	3.07728	2.7881	2.66176	3.28283	2.09086	3.55832	2.11889	3.96933	4.03233	3.65159	2.82674	3.44906	5.17804	3.16883	3.29129	3.40451	3.0318	4.62618	3.65317	2.641	3.33283	3.03248	3.20627	3.37547	3.31501	3.61381	3.07689	2.70505	3.17543	2.60046	2.61322	3.26326	2.93646	2.91478	2.74732	3.14461
19	1,3-methyl-imidazolium	4.23183	3.29157	3.63976	3.72277	4.72084	3.92018	4.08999	5.83139	2.43488	6.00568	7.00094	3.36145	3.31477	3.64545	3.25196	3.88366	1.52337	5.33307	1.26904	6.44505	5.91038	5.30408	4.81436	5.02241	5.11831	4.15923	4.7654	5.00259	3.77107	6.19969	5.03895	2.38248	4.43458	3.41262	4.55334	4.58831	3.7249	5.08937	3.79365	4.03051	4.67183	3.12777	4.47222	3.88136	4.22247	4.16841	5.11136	4.22867
20	1-benzyl-3-methyl-imidazolium	3.74402	4.33271	2.43117	2.59316	3.28718	3.7511	3.63938	5.07668	2.23391	4.66245	4.67692	2.89489	2.76032	3.10685	2.39428	3.08818	3.21485	4.33711	3.12742	4.98653	5.07116	4.55354	3.98482	4.50912	6.87422	4.26917	4.06245	4.36867	3.24578	6.41791	3.44837	3.82953	3.33237	4.23223	4.05963	4.47038	4.74739	4.19061	3.10527	2.6538	3.8926	2.24819	3.13363	3.05252	4.17252	3.71823	3.54036	3.76025
21	1-butoxymethyl-3-pentoxymethylimidazolium	4.44224	6.97348	2.74679	2.86128	3.41068	5.07071	3.92044	6.39317	2.62412	4.82737	4.61546	3.89571	3.41079	3.57372	2.91097	3.75181	5.74246	5.13294	6.38059	5.01022	6.58831	5.64706	4.64616	5.82438	9.65097	5.85768	4.78561	5.26587	4.39841	7.24472	3.55089	5.45306	4.055	6.00486	4.82974	5.39817	6.08654	4.91778	3.94523	2.90733	4.72714	2.67741	3.30983	3.67802	4.78536	4.60959	3.8565	4.93056
22	1-butoxymethyl-3-propoxymethylimidazolium	4.57265	7.17078	2.77902	2.88049	3.57815	5.11321	4.16709	6.49551	2.60023	5.10147	4.83424	3.84713	3.38153	3.59065	2.89924	3.74245	5.95526	5.35228	6.44357	5.39654	6.73101	5.79737	4.87495	6.01832	10.1947	5.99758	4.99378	5.54434	4.39161	7.92187	3.61996	5.78198	4.10469	6.20906	5.00462	5.72138	6.47567	5.06163	3.96245	2.97635	4.8213	2.67252	3.40002	3.68564	5.09884	4.72308	4.00398	5.02067
23	1-butyl-1-ethyl-pyrrolidinium	2.80184	2.7427	2.4645	2.66323	2.6458	2.50354	2.57034	3.77812	2.04595	3.63409	4.00232	2.91508	3.09689	2.61269	2.48994	3.18767	1.83617	3.19339	1.88595	3.72733	3.50149	3.22201	2.49222	3.02573	4.92734	2.73727	2.9821	3.04849	2.81062	4.30157	3.50463	2.41501	3.1389	2.71688	2.91602	3.02635	3.04884	3.31885	2.95178	2.49867	2.8099	2.44332	2.41006	3.20436	2.63065	2.59724	2.47338	2.85284
24	1-butyl-1-methylpiperidinium	3.04806	3.2715	2.55463	2.72079	2.83815	2.84004	2.8392	4.23856	2.10455	3.90202	4.2144	3.07352	3.16008	2.74674	2.57965	3.3028	2.21248	3.51403	2.28843	4.06465	4.01123	3.60239	2.80467	3.4402	5.73434	3.15267	3.26312	3.40106	3.05984	4.89435	3.5609	2.8004	3.31769	3.13423	3.21358	3.39852	3.49909	3.5848	3.12253	2.6194	3.10511	2.51017	2.53037	3.30549	2.97348	2.87227	2.67478	3.17918
25	1-butyl-1-methyl-pyrrolidinium	3.15789	3.27687	2.67578	2.80749	3.00199	2.89204	2.98994	4.36168	2.1072	4.08333	4.40564	3.09184	3.17453	2.78621	2.65941	3.3537	2.14179	3.66047	2.17484	4.27454	4.17574	3.75537	2.88364	3.57636	5.65928	3.24502	3.39568	3.52018	3.11458	5.0551	3.65868	2.79233	3.40482	3.17878	3.34064	3.47966	3.54397	3.71263	3.18033	2.7596	3.17644	2.60123	2.5786	3.35585	3.0587	2.95732	2.7504	3.26166
26	1-butyl-2-3-methyl-imidazolium	3.10763	3.33764	2.34147	2.63459	2.72549	3.02108	2.73235	4.3848	2.16517	3.965	4.24879	2.92153	3.01137	2.84649	2.40692	3.17021	2.32623	3.58361	2.28023	4.04216	4.16234	3.72349	3.10267	3.53979	5.64675	3.23949	3.32769	3.49948	2.97324	4.94218	3.57458	2.837	3.20974	3.19164	3.27727	3.48833	3.55736	3.64675	3.01371	2.42247	3.25007	2.28581	2.83133	3.18267	3.19241	2.99787	2.98519	3.12589
27	1-butyl-2-methyl-3-(phenylmethyl)imidazolium	2.91539	3.48131	2.11534	2.34957	2.43539	2.97072	2.54072	4.15424	2.08581	3.48525	3.61906	2.70804	2.71627	2.65717	2.19699	2.83897	2.5782	3.26493	2.71495	3.47938	3.92573	3.49843	2.83897	3.39704	5.2978	3.23167	3.08356	3.21862	2.79263	4.38708	3.07933	2.88823	2.87023	3.23273	3.07138	3.26426	3.43953	3.33423	2.74292	2.18129	3.03045	2.08489	2.53467	2.83529	2.92972	2.86375	2.66201	2.96787
28	1-butyl-3,4-dimethyl-pyridinium	2.98305	3.41885	2.22606	2.5621	2.55201	2.99687	2.55216	4.4371	2.19855	3.80719	4.03716	3.01958	3.03666	2.82886	2.36176	3.17489	2.41719	3.44984	2.42581	3.78918	4.04752	3.58423	3.06206	3.42226	5.9	3.18907	3.17368	3.40689	3.02433	4.76809	3.51388	2.84026	3.19545	3.15755	3.16651	3.36098	3.5164	3.5471	3.00988	2.28383	3.23827	2.20632	2.82436	3.1647	3.12292	2.92984	2.94581	3.13064
29	1-butyl-3,5-dimethyl-pyridinium	2.9164	3.18463	2.2151	2.54768	2.49828	2.91552	2.47226	4.23607	2.20098	3.70881	3.96428	2.99207	3.03504	2.82208	2.35496	3.15389	2.23037	3.34412	2.21746	3.67159	3.84276	3.43609	2.92535	3.27154	5.61033	3.04965	3.10063	3.23253	2.95047	4.53693	3.48833	2.6705	3.15692	2.9986	3.06607	3.23484	3.32987	3.46012	2.96826	2.26223	3.15623	2.20559	2.75897	3.14774	2.97895	2.82425	2.85192	3.01798
30	1-butyl-3-ethylimidazolium	3.60418	4.72486	2.45288	2.67394	3.03704	3.84716	3.2465	5.45361	2.3464	4.49135	4.60491	3.40419	3.19082	3.18371	2.56814	3.44904	3.47413	4.26736	3.52839	4.67532	5.23477	4.52295	3.8642	4.45018	7.96399	4.2609	3.9134	4.25237	3.62571	6.35377	3.58024	3.86924	3.63785	4.24411	3.92585	4.35141	4.70792	4.22081	3.44608	2.58859	3.97009	2.3731	3.07385	3.41534	4.00038	3.63802	3.43559	3.9301
31	1-butyl-3-ethyl-pyridinium	3.3711	4.41617	2.33775	2.63094	2.80576	3.58887	2.93303	5.11201	2.30292	4.17542	4.31193	3.25703	3.13951	3.03881	2.47632	3.31784	3.24943	3.92006	3.30912	4.26482	4.84162	4.1607	3.60268	4.09152	7.32747	3.88318	3.64181	3.88473	3.40501	5.7194	3.56699	3.56341	3.44969	3.88603	3.63447	3.94287	4.2958	3.93243	3.27053	2.43437	3.69665	2.2927	3.00968	3.31607	3.70302	3.36646	3.27267	3.64018
32	1-butyl-3-methyl-imidazolium	3.83969	4.61173	2.58433	2.80188	3.31794	3.9867	3.54651	5.57395	2.36129	4.79735	4.97866	3.38169	3.21206	3.28143	2.64076	3.5134	3.53351	4.55362	3.41904	5.19476	5.48253	4.76648	4.22233	4.68678	7.80236	4.44807	4.1953	4.54461	3.67201	6.95192	3.7684	4.06993	3.75728	4.4616	4.17615	4.61392	5.01434	4.43759	3.52774	2.76156	4.11322	2.45441	3.29721	3.5004	4.39539	3.8683	3.7383	4.06566
33	1-butyl-3-methyl-pyridinium	3.38641	4.22304	2.36155	2.67367	2.86743	3.56702	2.95959	5.09378	2.28243	4.28581	4.42555	3.15228	3.08698	3.062	2.46256	3.32472	2.97919	3.9731	2.95258	4.34972	4.87826	4.20726	3.6051	4.10031	6.94715	3.91407	3.68792	3.94458	3.30803	5.70934	3.66608	3.39862	3.42365	3.82855	3.69785	3.97473	4.16998	3.99727	3.22289	2.4701	3.70994	2.2936	3.0757	3.28912	3.69379	3.40141	3.33167	3.54257
34	1-butyl-4-(dimethylamino)-pyridinium	2.82805	3.16735	2.14131	2.46708	2.41098	2.82209	2.40525	4.09743	2.13558	3.56944	3.81937	2.83359	2.92756	2.72197	2.25597	3.01251	2.19794	3.21055	2.25603	3.52905	3.74978	3.3397	2.78255	3.18215	5.27099	2.96257	3.00186	3.09162	2.80626	4.34618	3.36677	2.61494	2.99689	2.95739	2.95271	3.12831	3.23376	3.32294	2.83992	2.18562	3.00906	2.13219	2.66121	3.02787	2.83892	2.73985	2.72636	2.88649
35	1-butyl-imidazolium	5.64431	9.01822	2.92129	2.84932	4.69963	6.25006	5.81939	7.62353	2.79731	7.29055	7.023	4.45864	3.85217	4.28828	2.92229	4.51873	8.57566	7.02708	8.41071	9.15216	8.176	6.96163	7.00211	7.48492	17.38	7.76276	6.37558	7.71307	5.31042	14.6581	3.68307	8.79897	5.0622	8.72035	6.65622	8.30131	10.486	6.22465	4.93558	3.36716	6.12601	2.62894	4.16423	4.4275	7.75435	5.93185	5.37817	6.49974
36	1-butyl-nicotinic-acid-butylester	3.65501	4.93674	2.56422	2.87385	3.05308	4.00235	3.2084	5.18142	2.47355	4.26284	4.31623	3.41059	3.23533	3.21933	2.73691	3.45712	4.1008	4.17913	4.06928	4.44396	5.05591	4.39415	4.13038	4.39241	7.41463	4.29673	3.91448	4.21405	3.65121	5.85068	3.73311	4.16513	3.65219	4.38146	3.92908	4.30862	4.71863	4.12269	3.43723	2.66112	3.99928	2.51863	3.38599	3.45526	4.22756	3.69298	3.70112	3.98171
37	1-butyl-pyridinium	4.04606	5.37499	2.58615	2.86756	3.44416	4.29944	3.72226	5.93639	2.38557	5.09767	5.09678	3.32449	3.17542	3.37425	2.61813	3.53038	3.94204	4.8868	3.75007	5.43314	6.00253	5.16104	4.61453	5.16769	8.66926	4.8666	4.44603	4.9242	3.70536	7.48079	3.93517	4.45667	3.77246	4.98986	4.47478	5.04249	5.40225	4.68908	3.54589	2.78746	4.34031	2.4324	3.54988	3.49344	4.80401	4.08836	4.04553	4.19005
38	1-decyl-3-methyl-imidazolium	3.82622	5.56274	2.51937	2.72489	3.003	4.29284	3.27578	5.57928	2.51269	4.36107	4.34329	3.64379	3.349	3.30623	2.715	3.59177	4.36516	4.35979	4.6629	4.46378	5.43779	4.71196	4.00243	4.76266	8.13594	4.72938	4.0955	4.42278	3.90491	6.13626	3.47391	4.37964	3.74351	4.85837	4.11953	4.56501	5.01191	4.31353	3.62064	2.62276	4.1434	2.49088	3.09561	3.53506	4.11421	3.91047	3.4786	4.21915
39	1-dodecyl-3-methyl-imidazolium	3.78466	5.38517	2.56815	2.77455	2.98762	4.30534	3.22859	5.51084	2.56143	4.2403	4.26419	3.71086	3.40383	3.33092	2.78519	3.64125	4.27356	4.28331	4.62964	4.33546	5.37393	4.65141	3.92973	4.68213	7.90193	4.6418	4.04608	4.32002	3.94549	5.83076	3.49208	4.26088	3.76953	4.72519	4.06244	4.4588	4.87157	4.25882	3.64614	2.6545	4.14811	2.55716	3.09507	3.57072	4.00833	3.88336	3.44727	4.22285
40	1-ethyl-1-methyl-pyrrolidinium	3.09544	2.46805	2.99231	3.16439	3.12457	2.65183	2.75657	4.38277	2.09501	4.17222	4.87434	3.06254	3.2017	2.8496	2.9034	3.4608	1.28457	3.70216	1.20935	4.10732	4.20392	3.80328	2.7023	3.44775	4.1882	2.87542	3.37071	3.33454	3.06827	4.23054	4.18372	1.90449	3.60121	2.45668	3.20703	3.1071	2.68538	3.83511	3.22214	3.04333	3.14371	2.88049	2.77453	3.47296	2.63013	2.85532	2.88708	3.05511
41	1-ethyl-2,3-dihydro-3-methylimidazole	5.71514	7.88147	3.63292	3.26101	6.19926	5.68731	7.6913	7.19334	2.68248	7.74611	7.58046	4.42242	3.90559	4.1591	3.37508	4.65876	6.56194	7.25571	6.10491	10.7392	7.86639	6.88288	7.07181	7.39699	14.8773	7.39263	6.55198	7.93927	5.21803	14.9364	4.158	8.42969	5.32637	7.96753	6.78707	8.51009	10.0538	6.27108	4.95653	4.33131	5.93618	3.11382	4.30372	4.55105	8.20023	5.79003	5.53354	6.64977
42	1-ethyl-2-3-methyl-imidazolium	3.09809	2.74887	2.49866	2.85323	2.84973	2.8327	2.64603	4.47947	2.15014	4.10066	4.6447	2.84098	2.97517	2.89684	2.49978	3.19249	1.57184	3.64541	1.46833	4.02582	4.26093	3.80721	3.01038	3.50372	4.56086	3.02543	3.34526	3.40254	2.8997	4.45393	3.9781	2.14997	3.30003	2.68718	3.20575	3.22025	2.95947	3.75013	3.00196	2.58573	3.24495	2.39709	3.05935	3.21525	2.90115	2.95912	3.15821	2.97872
43	1-ethyl-2,6-dimethylpyridinium	2.67727	2.25851	2.18687	2.66756	2.41133	2.37957	2.18196	3.79925	2.05852	3.56984	4.08509	2.54655	2.81691	2.652	2.24103	2.93404	1.35744	3.09662	1.26128	3.39297	3.5172	3.206	2.57195	2.89895	3.82631	2.46892	2.85953	2.83663	2.48706	3.70464	3.84886	1.85561	2.91543	2.23968	2.72153	2.69976	2.48857	3.28334	2.67029	2.22169	2.75935	2.14409	2.90607	2.97321	2.48148	2.51842	2.83487	2.48143
44	1-ethyl-2-methyl-3-(phenylmethyl)imidazolium	2.97191	3.31272	2.15685	2.39591	2.56026	2.93177	2.64785	4.19762	2.06645	3.66243	3.82983	2.62173	2.64501	2.68746	2.19199	2.81569	2.32982	3.36182	2.36766	3.67222	4.00203	3.5714	2.90728	3.42756	5.11745	3.18953	3.1551	3.28568	2.73789	4.50057	3.19603	2.75847	2.88366	3.09973	3.11834	3.29744	3.39179	3.41513	2.7121	2.25153	3.07549	2.08607	2.63486	2.80789	2.98796	2.8872	2.77108	2.94678
45	1-ethyl-2-methylpyrazolium	4.09702	3.75749	3.08533	3.22158	4.08289	3.89959	3.97868	5.69075	2.33217	5.51307	6.08185	3.18613	3.15816	3.42925	2.86797	3.61899	2.02056	5.03928	1.76704	6.07815	5.81507	5.17459	4.42348	4.99795	5.9493	4.34341	4.57188	4.86616	3.57625	6.6594	4.36638	2.8948	3.9814	3.81588	4.45622	4.66635	4.28055	4.8301	3.56517	3.39093	4.3562	2.75146	3.77145	3.60724	4.2381	4.02592	4.2937	4.05422
46	1-ethyl-3,4-dimethylimidazolium	3.16151	2.95586	2.47869	2.80533	2.87209	3.01659	2.72447	4.56878	2.23092	4.22913	4.68858	3.02437	3.05766	2.992	2.53013	3.29464	1.83164	3.76929	1.70867	4.17988	4.27223	3.85738	3.16899	3.61403	5.2212	3.1742	3.43157	3.60563	3.06758	4.8272	3.88379	2.42118	3.41604	2.92845	3.3695	3.38976	3.2497	3.84283	3.12682	2.57285	3.42743	2.38528	3.0692	3.29237	3.11833	3.08371	3.21996	3.15375
47	1-ethyl-3-hydroxymethyl-pyridinium	4.62869	5.64395	3.37831	3.50172	4.58581	4.70894	4.95984	6.23376	2.66412	5.96584	6.16213	3.93912	3.64164	3.82638	3.34581	4.17327	4.38406	5.67839	4.11808	6.92523	6.39138	5.64087	5.56523	5.69971	9.40811	5.42902	5.17183	5.792	4.38373	8.91416	4.64467	5.22355	4.70036	5.48705	5.1917	5.91041	6.3728	5.30782	4.20864	3.70122	5.00949	3.12636	4.28048	4.12628	5.78194	4.67802	4.95318	5.09511
48	1-ethyl-3-methyl-imidazolium	3.90786	3.84966	2.9854	3.2167	3.80852	3.81784	3.68692	5.59291	2.3719	5.27999	5.79184	3.31096	3.22968	3.41186	2.8799	3.65141	2.23722	4.80002	2.00746	5.60807	5.55658	4.93524	4.30249	4.72552	6.38594	4.2029	4.34173	4.63202	3.6137	6.44526	4.41405	3.03098	3.99436	3.7494	4.21226	4.43998	4.21085	4.6491	3.57724	3.221	4.27522	2.72974	3.74823	3.63318	4.17406	3.85885	4.19193	3.97863
49	1-ethyl-3-methylpyridinium	3.4317	3.65439	2.53916	2.92191	3.10153	3.43692	3.02448	5.20558	2.27725	4.52724	4.92606	3.08882	3.07574	3.13208	2.56651	3.35786	2.29368	4.14004	2.1471	4.58415	5.02965	4.35616	3.71751	4.12761	6.07606	3.66295	3.76318	3.94404	3.26786	5.59411	4.12864	2.88087	3.55668	3.38059	3.65332	3.84039	3.80562	4.15265	3.24862	2.67282	3.75353	2.41262	3.41461	3.35637	3.64308	3.3974	3.65532	3.48284
50	1-ethyl-3-propylimidazolium	3.59876	4.37908	2.50287	2.7392	3.10697	3.73205	3.24988	5.3649	2.32588	4.57009	4.76156	3.33139	3.16759	3.17645	2.58117	3.43292	3.08595	4.27624	3.05342	4.75984	5.19092	4.4951	3.8313	4.36994	7.46552	4.08498	3.91179	4.20362	3.54083	6.27534	3.71434	3.59493	3.6422	3.97562	3.84954	4.24738	4.49727	4.21779	3.41263	2.64789	3.92402	2.40016	3.13969	3.41576	3.93443	3.60045	3.48431	3.82974
51	1-ethyl-nicotinic-acid-ethylester	3.83259	4.547	2.83095	3.2384	3.52859	4.00736	3.56691	5.30059	2.47067	4.84394	5.04962	3.29579	3.21512	3.36516	2.88961	3.55436	3.53618	4.53272	3.23139	5.21056	5.27824	4.62763	4.63235	4.56315	7.19085	4.28924	4.18439	4.51039	3.60148	6.47544	4.3876	3.99133	3.86387	4.22895	4.16199	4.5473	4.81666	4.40622	3.47866	2.98587	4.24453	2.69323	3.95616	3.56724	4.6928	3.8656	4.31221	4.03786
52	1-ethyl-pyridinium	4.22462	4.188	3.08891	3.40361	4.17961	4.23492	4.07461	5.96407	2.42274	5.70252	6.13542	3.2859	3.22855	3.56373	2.92402	3.70141	2.45006	5.234	2.11244	6.22094	6.11325	5.33605	4.9633	5.27583	6.71501	4.62036	4.74234	5.19365	3.6995	7.21321	4.7824	3.36516	4.10826	4.2042	4.63427	5.06516	4.69075	4.96728	3.64976	3.38835	4.63027	2.76545	4.24689	3.68832	4.79563	4.23961	4.80085	4.21933
53	1-heptyl-3-methyl-imidazolium	3.87991	5.30829	2.47504	2.67437	3.08308	4.23353	3.40073	5.5975	2.4326	4.58407	4.5572	3.51458	3.25677	3.28812	2.61905	3.52909	4.32237	4.49777	4.47794	4.76973	5.49907	4.76549	4.11589	4.81988	8.79443	4.74599	4.17336	4.56934	3.80856	6.69592	3.48866	4.49768	3.70678	4.86633	4.20473	4.75557	5.22195	4.39008	3.56729	2.6124	4.16088	2.40772	3.11672	3.48103	4.30182	3.93994	3.54214	4.18772
54	1-hexadecyl-2-3-methyl-imidazolium	3.29449	4.2099	2.67263	2.92806	2.85396	3.54432	2.90397	4.51563	2.50255	3.71245	3.9582	3.47507	3.44128	3.08314	2.85199	3.51986	3.21383	3.65707	3.46046	3.86572	4.2825	3.83776	3.29808	3.80689	5.91356	3.73023	3.47081	3.64136	3.48954	4.62312	3.62919	3.41061	3.54174	3.7649	3.46481	3.70509	3.93414	3.7063	3.39287	2.69114	3.56688	2.70885	2.97103	3.53297	3.36047	3.28491	3.10768	3.61232
55	1-hexadecyl-3-methyl-imidazolium	3.78979	5.44851	2.71771	2.92239	3.06088	4.36425	3.26144	5.56089	2.68268	4.14829	4.23253	3.89514	3.54517	3.41108	2.96962	3.73924	4.21588	4.27753	4.61491	4.26092	5.38856	4.66676	3.95338	4.69678	7.46303	4.64166	4.01466	4.29126	4.10292	5.52359	3.59677	4.17568	3.90209	4.66066	4.02937	4.37598	4.76829	4.27842	3.7664	2.7842	4.22425	2.72875	3.18657	3.69374	3.97923	3.90182	3.51444	4.33393
56	1-hexyl-1-methyl-pyrrolidinium	3.22024	3.69623	2.60042	2.73777	2.93005	3.05636	3.02547	4.3436	2.15256	4.00638	4.21617	3.15384	3.2098	2.82141	2.62851	3.34995	2.65728	3.65355	2.81817	4.22585	4.16593	3.74176	2.96562	3.65889	6.30081	3.44841	3.43324	3.61804	3.18249	5.22858	3.51607	3.2229	3.37383	3.5611	3.40682	3.68892	3.88973	3.67604	3.2039	2.67578	3.24475	2.55549	2.56062	3.35518	3.19622	3.05844	2.7454	3.37289
57	1-hexyl-2-3-methyl-imidazolium	3.199	3.77102	2.33375	2.60435	2.70982	3.20148	2.79739	4.4382	2.21554	3.93414	4.11237	3.03173	3.0728	2.88385	2.435	3.19946	2.83967	3.63226	2.88128	4.03471	4.21898	3.77282	3.20805	3.67389	6.17054	3.45661	3.41897	3.59906	3.10102	5.12029	3.45816	3.23764	3.24237	3.57515	3.39124	3.66982	3.88286	3.65969	3.08672	2.40795	3.33293	2.30022	2.80563	3.22073	3.34608	3.11787	2.9883	3.28971
58	1-hexyl-3,5-dimethylpyridinium	2.97876	3.45537	2.27201	2.58046	2.54307	3.04416	2.55715	4.27148	2.25242	3.69019	3.91513	3.10492	3.11263	2.86082	2.43339	3.22872	2.52402	3.36461	2.56537	3.70843	3.87419	3.47179	3.0163	3.3574	5.86718	3.18478	3.16322	3.30005	3.07219	4.62019	3.45041	2.91159	3.22529	3.25638	3.11705	3.37673	3.53367	3.47845	3.05036	2.3142	3.26435	2.27594	2.76795	3.21326	3.09504	2.92241	2.88323	3.16375
59	1-hexyl-3-methyl-4-(dimethylamino)pyridinium	2.66198	2.79138	2.18504	2.50149	2.33641	2.59581	2.28665	3.60145	2.15908	3.33518	3.62454	2.86594	3.01922	2.65804	2.32453	3.05633	2.04278	2.95644	2.0919	3.32272	3.20828	2.97715	2.5701	2.84353	4.86184	2.69226	2.80905	2.87847	2.72822	3.9063	3.32869	2.46042	2.96895	2.75195	2.76736	2.922	3.00414	3.09319	2.81461	2.19447	2.8363	2.21392	2.55997	3.06895	2.63847	2.55191	2.56875	2.74793
60	1-hexyl-3-methyl-imidazolium	3.88247	5.27394	2.49831	2.70403	3.15853	4.17496	3.47451	5.62171	2.40925	4.71031	4.69316	3.48667	3.25108	3.30574	2.62022	3.52826	4.22749	4.51307	4.28836	4.94249	5.55536	4.77985	4.20102	4.80726	8.73243	4.69708	4.20728	4.60035	3.78728	6.9067	3.56339	4.50031	3.73075	4.87382	4.24126	4.79743	5.27992	4.40393	3.56826	2.64957	4.18901	2.41338	3.17756	3.49516	4.40852	3.94031	3.62059	4.18835
61	1-hexyl-3-methyl-pyridinium	3.43795	4.53248	2.3549	2.64307	2.81796	3.74281	2.96889	5.09469	2.33298	4.14694	4.25899	3.27327	3.15725	3.07852	2.50101	3.37671	3.45205	3.94997	3.54313	4.25911	4.90866	4.20407	3.64703	4.1708	7.33268	4.04638	3.69875	3.97154	3.43395	5.71707	3.53722	3.71648	3.45378	4.14173	3.67733	4.09758	4.39453	3.97604	3.28953	2.44835	3.77089	2.31599	3.01879	3.32971	3.76547	3.44803	3.28861	3.68507
62	1-hexyl-4-(dimethylamino)pyridinium	2.8905	3.3445	2.20687	2.51597	2.45553	2.91763	2.47388	4.08642	2.19702	3.53714	3.7746	2.94033	3.01366	2.76922	2.34133	3.08782	2.45685	3.23983	2.55749	3.55758	3.76205	3.36732	2.86483	3.248	5.4637	3.06895	3.06053	3.17626	2.91338	4.38791	3.35604	2.81945	3.06798	3.13171	3.03837	3.21135	3.39483	3.33959	2.92142	2.24343	3.09186	2.21236	2.68206	3.10261	2.9404	2.82251	2.76323	3.00736
63	1-hexyl-4-methyl-pyridinium	3.41103	4.54481	2.35366	2.64205	2.81979	3.69785	2.97324	5.12173	2.3239	4.15247	4.26898	3.29148	3.16185	3.07512	2.5034	3.33525	3.50182	3.94738	3.60548	4.27069	4.87674	4.20738	3.67508	4.1721	7.31312	3.97733	3.67424	3.97413	3.46103	5.75534	3.53485	3.75216	3.46547	4.08284	3.68199	4.06845	4.43143	3.95638	3.30311	2.44756	3.71738	2.31455	3.02466	3.33547	3.79218	3.43923	3.30384	3.71752
64	1-hexyloxymethyl-3-methylimidazolium	4.43485	6.35263	2.68274	2.83022	3.48199	4.77874	3.99447	6.11933	2.51912	5.04927	4.8587	3.65792	3.31708	3.5006	2.78544	3.66432	5.37355	5.14723	5.56003	5.3764	6.30925	5.46166	4.7409	5.63752	9.61737	5.56077	4.81847	5.3573	4.12938	7.75754	3.62223	5.44484	3.95575	5.78415	4.84357	5.47646	6.16533	4.8891	3.8105	2.87422	4.60618	2.5725	3.37677	3.61956	4.9999	4.50845	3.9481	4.69772
65	1-hexyl-pyridinium	4.00521	5.67272	2.46603	2.72737	3.19752	4.38105	3.54307	5.87615	2.40939	4.7711	4.69822	3.39923	3.19509	3.33644	2.57053	3.4755	4.66117	4.73447	4.67361	5.02532	5.95385	5.0646	4.4745	5.13069	8.92079	4.96566	4.38618	4.83541	3.77644	7.19131	3.65194	4.82049	3.69696	5.16592	4.41419	4.98048	5.53249	4.55558	3.54893	2.6284	4.28999	2.36885	3.34494	3.4579	4.68926	4.11116	3.82319	4.23846
66	1-isobutenyl-3-methylimidazolium	3.60971	4.27293	2.45488	2.74479	3.1334	3.7408	3.26342	5.38719	2.33113	4.64884	4.83461	3.20696	3.07708	3.20928	2.51323	3.37125	2.99189	4.32545	2.85954	4.83423	5.23171	4.54539	3.98913	4.41245	7.19308	4.0681	3.96294	4.23806	3.44629	6.30071	3.79562	3.53134	3.5869	3.92912	3.91493	4.25556	4.47169	4.2601	3.34066	2.61759	3.96958	2.33086	3.32891	3.34875	4.03854	3.63165	3.67932	3.76521
67	1-methyl-1-pentylpyrrolidinium	3.98597	5.50899	2.56727	2.71447	3.29095	4.18395	3.72729	5.80711	2.33341	4.71638	4.68073	3.41565	3.18286	3.23584	2.61606	3.48958	4.14654	4.68972	4.40857	5.021	5.8579	5.03013	4.06424	5.09284	8.71748	4.90019	4.31078	4.75935	3.76733	7.11785	3.57514	4.57863	3.68977	5.04154	4.32954	4.82266	5.40083	4.53005	3.54199	2.74535	4.13932	2.45816	3.04925	3.43226	4.3195	4.0036	3.47857	4.22624
68	1-methyl-1-propylpyrrolidinium	3.11868	2.96773	2.7737	2.91083	3.05813	2.79718	2.93207	4.39629	2.08808	4.13939	4.57611	3.07796	3.17223	2.80136	2.72729	3.38154	1.79488	3.66446	1.78335	4.25723	4.20712	3.79419	2.82316	3.54182	5.2154	3.07885	3.3669	3.44	3.09985	4.82404	3.82498	2.45618	3.46753	2.89137	3.26031	3.34733	3.25141	3.74617	3.19097	2.8545	3.14666	2.6806	2.63116	3.38582	2.91769	2.92088	2.78658	3.20155
69	1-methyl-2-(phenylmethyl)pyrazolium	3.97582	4.89307	2.44314	2.60046	3.41281	4.07487	3.88096	5.42606	2.26227	4.86925	4.84685	2.93555	2.79091	3.20257	2.38601	3.13907	3.65015	4.6387	3.56355	5.35327	5.53659	4.90712	4.29075	4.93377	7.72602	4.69732	4.32118	4.73341	3.37093	7.13254	3.47013	4.2544	3.3995	4.71302	4.35921	4.82723	5.30209	4.40449	3.2015	2.69196	4.10747	2.24338	3.22674	3.10801	4.52324	3.98256	3.70633	3.98394
70	1-methyl-2-propylpyrazolium	4.07133	4.48198	2.77139	2.93683	3.69879	4.01267	3.90608	5.76034	2.32939	5.26016	5.48485	3.24827	3.14874	3.34833	2.69101	3.53646	2.92241	4.92802	2.68526	5.78689	5.85081	5.13613	4.3983	5.05986	7.31147	4.58919	4.50122	4.89813	3.62991	7.25338	3.96937	3.71677	3.82469	4.35856	4.45785	4.86963	4.97217	4.71726	3.54519	3.0208	4.28295	2.54869	3.46563	3.51844	4.48959	4.04436	3.97284	4.11452
71	1-methyl-3-(1-methylethyl)imidazolium	3.67649	4.14058	2.66471	2.92174	3.35845	3.73628	3.4087	5.46597	2.33372	4.82308	5.14147	3.31025	3.18361	3.24458	2.68024	3.51403	2.74705	4.43976	2.5911	5.08888	5.32957	4.62338	4.03165	4.45523	7.10027	4.03389	4.04354	4.31214	3.55174	6.40348	4.01381	3.39154	3.76873	3.82283	3.96415	4.26456	4.40441	4.37522	3.46619	2.84136	4.008	2.50938	3.38988	3.4923	4.06662	3.66714	3.76487	3.86697
72	1-methyl-3-(2,2,2-trifluoroethyl)imidazolium	6.09519	7.02624	3.51563	2.81223	5.88014	5.65181	7.8024	7.01537	2.46264	7.35265	6.61655	4.24759	3.76048	3.87926	3.2358	4.49373	6.26227	7.46196	5.0393	10.1052	7.79002	7.2479	7.37831	7.59134	12.7907	7.43151	6.85323	8.14217	5.26797	14.6942	4.1939	8.30201	5.13539	8.10273	7.10363	8.64919	10.1404	6.47756	5.11317	4.17164	5.75536	3.05369	4.07398	4.43032	9.04162	6.01567	5.37743	6.48208
73	1-methyl-3-(2-methylpropyl)imidazolium	3.86454	4.71936	2.61044	2.79037	3.35839	3.95259	3.59734	5.62513	2.34654	4.88965	5.02178	3.38656	3.19951	3.27195	2.64596	3.52403	3.40543	4.61473	3.31447	5.23631	5.55481	4.81108	4.15658	4.7346	7.99491	4.42931	4.21785	4.6064	3.68437	6.97007	3.73968	3.98718	3.76875	4.38989	4.18942	4.65283	4.97757	4.47779	3.54055	2.79843	4.13513	2.46888	3.23719	3.49426	4.32234	3.83679	3.68385	4.07772
74	1-methyl-3-(3-phenyl-propyl)-imidazolium	3.32171	3.99012	2.27423	2.43086	2.82519	3.39165	3.04128	4.62417	2.16239	4.02992	4.0799	2.82164	2.68244	2.88316	2.30997	2.92665	3.06412	3.76472	3.08518	4.12073	4.49496	4.01481	3.41472	3.93847	6.25548	3.73598	3.53926	3.78222	3.06359	5.30205	3.14787	3.42118	3.11002	3.70556	3.55485	3.79983	4.07875	3.74291	2.92514	2.41344	3.47955	2.1695	2.77999	2.90336	3.54802	3.29518	3.07621	3.39681
75	1-methyl-3-heptoxymethylimidazolium	4.31934	6.36682	2.66461	2.81545	3.39648	4.79374	3.88257	6.0725	2.53966	4.91501	4.74468	3.69866	3.344	3.50188	2.79364	3.66368	5.41002	5.03829	5.69936	5.19131	6.19109	5.38221	4.63419	5.53276	9.48732	5.47401	4.71495	5.2187	4.15226	7.36684	3.57653	5.37773	3.94071	5.78351	4.75368	5.34139	6.04517	4.81226	3.81826	2.8376	4.59509	2.57411	3.32705	3.62312	4.86323	4.45578	3.87322	4.68571
76	1-methyl-3-nonoxymethylimidazolium	4.28378	6.36562	2.63098	2.78629	3.26118	4.76003	3.69656	6.04156	2.57843	4.69458	4.53656	3.73793	3.35621	3.4734	2.79565	3.6506	5.30622	4.89568	5.7125	4.86205	6.13897	5.32952	4.46325	5.45772	9.10269	5.45835	4.59091	5.02219	4.16104	6.94566	3.49445	5.15041	3.90273	5.65563	4.63916	5.16495	5.75032	4.73581	3.80285	2.77721	4.51792	2.56896	3.25422	3.6034	4.61669	4.37875	3.75643	4.62229
77	1-methyl-3-nonylimidazolium	3.87677	5.49756	2.49668	2.69907	3.03255	4.27836	3.33687	5.62313	2.4801	4.42939	4.41432	3.61687	3.32162	3.30077	2.67794	3.54516	4.49475	4.42914	4.77198	4.58698	5.53803	4.76478	4.08794	4.81701	8.4406	4.73041	4.14245	4.49698	3.90546	6.39191	3.46595	4.52107	3.74382	4.89426	4.14482	4.61996	5.17233	4.35532	3.62341	2.61373	4.1805	2.4552	3.11105	3.52319	4.22597	3.90971	3.52243	4.25489
78	1-methyl-pyridinium	4.78437	3.53057	3.94459	4.00466	5.8352	4.4538	5.1099	6.21319	2.50857	6.85925	7.83685	3.35405	3.35155	3.88167	3.36936	4.01056	1.48602	6.14886	1.12921	8.12362	6.56722	5.97666	6.05257	5.80901	5.2021	4.84087	5.47758	5.92603	3.92935	7.39758	5.52241	2.5997	4.68979	3.9291	5.29228	5.47826	4.32966	5.62039	3.95538	4.57172	5.30258	3.22631	5.31357	4.02205	5.26717	4.79636	6.28117	4.72751
79	1-octadecyl-3-methyl-imidazolium	3.78189	5.46176	2.79052	2.99457	3.09912	4.39475	3.27985	5.53998	2.72957	4.10697	4.22197	3.95704	3.60089	3.44455	3.05116	3.77432	4.16081	4.25673	4.567	4.23492	5.3491	4.65417	3.95157	4.68133	7.2171	4.62071	4.00106	4.24814	4.15045	5.38652	3.6509	4.12574	3.94835	4.62592	4.00518	4.34786	4.71321	4.26898	3.80539	2.84789	4.25013	2.81	3.22415	3.74133	3.96129	3.91131	3.53831	4.36204
80	1-octyl-1-methyl-pyrrolidinium	3.25106	3.92747	2.60084	2.75537	2.89384	3.1847	3.01026	4.35259	2.21173	3.93065	4.11919	3.23295	3.2713	2.85938	2.66341	3.39024	2.92324	3.65924	3.18204	4.1375	4.18068	3.76038	3.01436	3.7241	6.42161	3.57768	3.45106	3.65324	3.25698	5.16393	3.4986	3.39408	3.39769	3.68862	3.44578	3.74315	3.99979	3.67173	3.24998	2.66115	3.29805	2.58066	2.59793	3.39524	3.23359	3.11401	2.77758	3.447
81	1-octyl-3-methyl-imidazolium	3.87049	5.48661	2.48824	2.69306	3.04671	4.27305	3.34624	5.5974	2.45981	4.50507	4.4674	3.56709	3.29516	3.30735	2.65443	3.55542	4.36612	4.45334	4.57203	4.64546	5.51177	4.77397	4.07965	4.80631	8.46185	4.70518	4.15238	4.51708	3.84858	6.48686	3.48505	4.46544	3.72321	4.92633	4.18616	4.70662	5.14601	4.36473	3.59046	2.61169	4.15097	2.43708	3.11324	3.50475	4.23557	3.9273	3.52471	4.20174
82	1-octyl-pyridinium	3.96956	5.89884	2.45918	2.71172	3.08401	4.47706	3.41866	5.84755	2.46052	4.56933	4.48863	3.50225	3.25537	3.3304	2.61018	3.51295	4.89311	4.62198	5.09502	4.74453	5.88037	5.00948	4.34637	5.09637	8.91099	5.04029	4.30097	4.72718	3.86486	6.82901	3.55878	4.8347	3.70402	5.25452	4.34137	4.87736	5.43988	4.49936	3.58745	2.5931	4.29145	2.39692	3.25905	3.48311	4.51525	4.09652	3.7062	4.28791
83	1-octylquinolinium	3.2728	4.36402	2.2495	2.56125	2.62158	3.56317	2.75246	4.75144	2.32673	3.80539	3.90462	3.13655	3.0519	2.98927	2.41907	3.19201	3.42201	3.7033	3.60036	3.83797	4.54475	3.96822	3.44603	3.92549	6.52446	3.82493	3.47924	3.70125	3.26874	5.06071	3.37972	3.5535	3.2598	3.8859	3.46758	3.79149	4.09222	3.73223	3.13072	2.31593	3.55435	2.23862	2.95913	3.18513	3.51413	3.30835	3.16042	3.47973
84	1-pentyl-3-methyl-imidazolium	3.88779	5.00042	2.52745	2.73625	3.24381	4.0958	3.54535	5.57755	2.38692	4.80449	4.84202	3.43636	3.22751	3.28964	2.61917	3.50614	4.01351	4.53915	3.9696	5.11039	5.50226	4.78334	4.26947	4.76165	8.29107	4.59669	4.2298	4.59596	3.74383	6.98643	3.64145	4.41038	3.7446	4.61909	4.24758	4.75754	5.26191	4.42666	3.55691	2.69535	4.12337	2.41988	3.24244	3.49525	4.48126	3.88361	3.70135	4.15834
85	1-(phenylmethyl)pyridinium	3.89545	4.63322	2.44439	2.6941	3.42765	3.95552	3.80594	5.26215	2.28295	4.83505	4.84444	2.88985	2.78346	3.20294	2.39996	3.12474	3.56811	4.57347	3.38214	5.2907	5.34984	4.77265	4.39217	4.76656	7.31252	4.52521	4.24593	4.66346	3.28959	6.9444	3.67433	4.21034	3.39103	4.51688	4.26131	4.74831	5.13218	4.35552	3.15388	2.68709	4.0714	2.24362	3.45695	3.10324	4.61228	3.91575	3.89759	3.87447
86	1-propyl-2-3-methyl-imidazolium	3.12307	3.14688	2.39516	2.70373	2.79155	2.96991	2.7346	4.4622	2.15424	4.05126	4.41713	2.89636	2.99413	2.8711	2.43299	3.1837	2.03193	3.64814	1.95485	4.09567	4.25177	3.79212	3.09724	3.57164	5.30821	3.17788	3.35947	3.47378	2.95817	4.85624	3.71502	2.59477	3.25031	3.01933	3.26939	3.40621	3.3787	3.71424	3.01729	2.48522	3.27543	2.318	2.91218	3.19468	3.1224	3.01182	3.05815	3.094
87	1-propyl-3-methyl-imidazolium	3.89648	4.42263	2.72613	2.93202	3.53387	3.8979	3.67253	5.63429	2.35391	5.07685	5.30794	3.35488	3.20684	3.32286	2.71556	3.57265	2.99243	4.70713	2.80627	5.4479	5.58545	4.86757	4.27956	4.74751	7.45636	4.33931	4.271	4.62006	3.65913	6.93072	3.97868	3.69745	3.85087	4.19742	4.22949	4.64456	4.78343	4.55248	3.55649	2.93565	4.1846	2.54532	3.44204	3.54392	4.36817	3.86954	3.9004	4.05491
88	1-tert-butyl-pyridinium	3.16916	3.36384	2.38904	2.78592	2.84144	3.1374	2.75628	4.77277	2.21408	4.17347	4.54454	2.97601	3.01912	2.96508	2.45607	3.23048	2.21317	3.7784	2.0822	4.1865	4.534	3.95684	3.38538	3.72554	5.70288	3.32428	3.4602	3.58605	3.07233	5.1031	3.94325	2.73711	3.35184	3.12618	3.35416	3.51827	3.51891	3.84604	3.08823	2.48687	3.44005	2.30219	3.19367	3.24031	3.36373	3.11389	3.35137	3.22139
89	1-tetradecyl-3-methyl-imidazolium	3.80262	5.47721	2.64751	2.85224	3.0266	4.34837	3.24768	5.57745	2.62076	4.18596	4.24645	3.8204	3.48277	3.37272	2.88488	3.685	4.25565	4.2917	4.64023	4.29472	5.41513	4.6849	3.94891	4.72154	7.67025	4.66315	4.02938	4.32223	4.04387	5.6706	3.54643	4.22141	3.84781	4.70645	4.0485	4.43227	4.82453	4.28355	3.71835	2.7235	4.19904	2.64876	3.14141	3.64015	3.99592	3.88996	3.48261	4.29684
90	2,4,5-trimethylimidazolium	4.29105	4.66861	2.82127	2.70887	4.04878	4.17832	4.28322	5.76565	2.66056	6.4161	6.85337	4.10693	3.65646	3.89346	2.79461	4.26491	3.09939	5.29167	2.86067	7.59027	5.49965	4.97438	4.72429	4.94741	10.0809	4.6634	4.82627	5.39715	4.33064	9.37811	3.48162	4.08877	4.64962	4.72137	4.84752	5.58426	6.11527	4.98375	4.30438	3.18047	4.90633	2.54126	3.61277	4.14992	4.94233	4.23311	4.31298	4.82934
91	2-methyl-1-(1-methylpropyl)-3-(phenylmethyl)imidazolium	2.82906	3.28476	2.08933	2.32499	2.39011	2.84583	2.46963	4.06837	2.06093	3.41398	3.56704	2.67484	2.68301	2.61406	2.16989	2.80072	2.37192	3.17411	2.49334	3.38385	3.80716	3.39018	2.72865	3.24997	5.08861	3.05638	2.9869	3.11066	2.73295	4.2106	3.06571	2.71728	2.8309	3.02946	2.95595	3.14914	3.26852	3.25495	2.69642	2.15189	2.95662	2.06044	2.49343	2.79546	2.80756	2.76154	2.59709	2.87787
92	2-methyl-1-(phenylmethyl)-3-propylimidazolium	2.95041	3.48931	2.10674	2.34087	2.46399	2.98284	2.57711	4.22403	2.07602	3.55515	3.68394	2.66714	2.6697	2.66942	2.17189	2.81353	2.51078	3.31703	2.6297	3.53604	4.02079	3.56796	2.86192	3.45631	5.28073	3.25933	3.12705	3.28111	2.77313	4.46437	3.09567	2.85554	2.86046	3.21593	3.1009	3.29075	3.4451	3.37219	2.72151	2.18513	3.06581	2.06131	2.55739	2.80447	2.94879	2.88146	2.6914	2.96635
93	3-butyl-4-methylthiazolium	3.60687	4.49626	2.848	3.02907	3.44437	3.89621	3.55646	5.17041	2.48661	4.79159	4.9622	3.66793	3.4432	3.34703	2.94903	3.73376	3.39018	4.27153	3.25307	5.01758	4.98119	4.33973	4.1683	4.31096	7.74108	4.0599	3.9611	4.26737	3.86785	6.5204	3.90796	3.88397	3.96706	4.12615	3.93683	4.34481	4.67715	4.2214	3.69842	2.9964	4.15337	2.73465	3.36333	3.69899	4.2935	3.6467	3.78662	4.17228
94	3-butyl-5-methylthiazolium	3.5605	4.35949	2.81012	2.98742	3.37155	3.86719	3.48444	5.14868	2.49058	4.68509	4.88529	3.69395	3.44723	3.34056	2.9295	3.72681	3.31416	4.21826	3.21753	4.90513	4.90735	4.31477	4.06793	4.26059	7.67969	4.04511	3.90012	4.22622	3.87034	6.38567	3.85364	3.80573	3.95346	4.07454	3.89096	4.30174	4.60434	4.17016	3.69285	2.94921	4.09283	2.71167	3.29579	3.68839	4.17978	3.61784	3.70136	4.14538
95	3-ethylthiazolium	4.90965	5.74358	4.2381	4.04686	5.93428	5.51388	5.94972	6.72103	2.76448	7.02692	7.4491	4.2512	3.81612	4.17038	3.86306	4.51057	3.89063	6.26856	3.22476	8.61085	7.07464	6.081	7.08346	6.25184	9.63782	5.8242	5.63301	6.47661	5.02148	10.3355	5.0882	5.06526	5.30908	5.53361	5.6195	6.54318	6.69868	5.65297	4.6707	4.76711	6.01371	3.66056	4.92461	4.4618	7.00467	5.21717	6.19676	6.05733
96	3-methyl-1-octyl-pyridinium	3.4461	4.69887	2.39891	2.67513	2.80893	3.79596	2.96405	5.09239	2.39255	4.07181	4.17089	3.38493	3.2324	3.11643	2.57688	3.40342	3.62687	3.93737	3.7924	4.16579	4.85426	4.20104	3.64927	4.18033	7.32253	4.07713	3.70292	3.95386	3.53766	5.55674	3.50923	3.79765	3.5084	4.15071	3.70409	4.07118	4.41999	3.95109	3.35698	2.47754	3.78345	2.38084	3.01234	3.38637	3.75153	3.48719	3.28039	3.77464
97	3-methyl-imidazolium	7.00709	7.36456	4.06549	3.42994	10.9097	6.91471	12.5087	7.72023	2.87671	11.3457	11.6215	4.41183	4.07798	4.92288	3.36296	5.23337	4.29113	9.52728	3.05314	22.6904	8.81816	8.02701	12.2703	8.84407	13.8979	8.52367	8.42373	10.8561	5.65712	21.9365	4.53483	7.54168	6.23189	8.56473	8.81236	11.5697	12.4041	7.52901	5.59065	5.6776	7.98886	3.06602	6.26726	5.17038	13.3691	7.31141	9.14919	8.27325
98	4,5-dichloro-1-ethyl-3-methylimidazolium	3.56531	3.90987	2.441	2.79284	3.12521	3.57229	3.16331	4.95365	2.31353	4.64733	4.84953	3.19252	3.13879	3.15898	2.52274	3.41519	2.99478	4.22263	2.61771	4.91605	4.81105	4.28178	4.11633	4.16528	6.75275	3.85448	3.91892	4.18155	3.38255	6.2648	4.11213	3.56596	3.58931	3.80075	3.85779	4.24866	4.39475	4.14683	3.37488	2.59377	3.84272	2.3179	3.42647	3.41864	4.26331	3.52404	3.80213	3.65051
99	4-(dimethylamino)-1-ethylpyridinium	2.78523	2.82585	2.14574	2.51405	2.43031	2.70895	2.35559	4.11131	2.11128	3.64248	3.98794	2.72631	2.85824	2.73802	2.22709	2.98492	1.81128	3.24597	1.80583	3.52562	3.78634	3.38687	2.71495	3.17058	4.82525	2.83104	2.97114	3.09388	2.70557	4.19567	3.52598	2.29338	2.97424	2.71711	2.92872	3.00417	2.96482	3.37465	2.78106	2.19836	2.96253	2.11285	2.74173	2.99034	2.70615	2.70485	2.77059	2.75935
100	4-methyl-1-octyl-pyridinium	3.449	4.73865	2.40508	2.68303	2.8132	3.79164	2.96579	5.12263	2.39438	4.08023	4.17267	3.40061	3.24235	3.11073	2.58514	3.41594	3.63043	3.94723	3.80394	4.17006	4.88523	4.21557	3.65813	4.1912	7.34332	4.0652	3.69397	3.96023	3.55509	5.58623	3.51937	3.80074	3.51994	4.16284	3.70016	4.06187	4.42489	3.95725	3.36759	2.48301	3.78327	2.38756	3.02051	3.39617	3.7578	3.48627	3.28949	3.79105
101	4-methyl-n-butylpyridinium	3.36511	4.21192	2.35125	2.66853	2.85971	3.53813	2.95594	5.12317	2.27752	4.23884	4.42684	3.17167	3.09142	3.04541	2.46024	3.29273	3.03956	3.97911	3.0196	4.35058	4.90332	4.20692	3.64262	4.081	7.02182	3.79571	3.66281	3.90424	3.33407	5.74212	3.66217	3.44028	3.4334	3.76415	3.6279	3.93534	4.20961	3.98968	3.23508	2.45939	3.68329	2.28521	3.09521	3.29331	3.72704	3.3527	3.35632	3.57189
102	benzyl-triphenyl-phosphonium	2.38256	2.51186	1.8451	2.12295	2.04275	2.33858	2.05723	3.19523	1.96251	2.82459	3.01046	2.31907	2.39362	2.36426	1.94275	2.44888	1.93645	2.61243	2.00679	2.77111	2.90034	2.70438	2.32189	2.57589	3.82542	2.44556	2.48857	2.54809	2.29219	3.25129	2.78436	2.24874	2.43481	2.43043	2.46191	2.56406	2.64062	2.72609	2.31391	1.87573	2.49595	1.84148	2.33811	2.46013	2.36369	2.32702	2.32848	2.36705
103	bis(2-methoxyethyl)ammonium	5.29912	7.65399	3.88508	3.57218	5.57254	5.5106	6.43604	6.92504	2.7339	6.9228	6.9099	4.59777	3.97317	4.07477	3.74384	4.64201	6.12603	6.61077	6.18441	8.88264	7.33677	6.37102	6.23911	6.7268	13.5948	6.73952	5.99199	7.05345	5.28541	11.9962	4.41242	7.15397	5.39001	7.11206	6.15703	7.36695	8.62371	5.921	4.89822	4.37706	5.70245	3.48224	4.06331	4.56494	6.99958	5.37223	5.0449	6.45957
104	butyl-diethanolammonium	6.37491	8.70392	4.69398	4.04807	6.96759	6.19031	8.73592	7.35742	2.97305	7.93483	7.61126	5.21772	4.42602	4.49737	4.46995	5.29161	8.10357	7.90217	7.90846	10.6193	8.09468	7.35619	7.44091	7.96701	15.277	8.07536	7.23726	8.62352	6.07922	14.8965	4.83989	9.63187	6.27428	8.96904	7.49596	9.19083	10.8745	6.87942	5.64891	5.37508	6.42219	4.21796	4.5637	5.15728	8.52966	6.36114	5.81697	7.65102
105	butyltrimethylammonium	3.9488	4.11628	3.12036	3.09606	3.87857	3.67196	4.03578	5.42351	2.23228	5.04823	5.29673	3.36987	3.28645	3.17073	2.97375	3.6645	2.57066	4.71922	2.46534	5.59402	5.49645	4.88811	3.83862	4.75333	6.80988	4.26411	4.32219	4.64253	3.66414	6.70694	3.98598	3.48105	3.93215	4.07219	4.27216	4.5587	4.55648	4.56543	3.61265	3.34939	3.96697	2.89967	3.02925	3.62833	4.07021	3.77217	3.46022	4.07782
106	choline	6.0317	4.25544	7.09673	5.24914	9.85135	5.09312	8.23011	6.77782	2.72103	8.68734	9.97777	4.68784	4.28106	4.38275	5.47653	5.38842	1.7932	7.89204	1.43091	11.6847	7.46318	7.02546	7.03325	7.08455	6.28884	5.94748	7.05281	7.69788	5.59073	9.20474	6.10257	3.20052	6.88097	4.88416	6.90778	7.10523	5.23463	6.83167	5.45327	8.48885	6.31648	5.52254	5.28391	5.33807	6.26336	5.74844	6.81705	7.06293
107	dibutylimidazolium	3.55269	4.81801	2.41812	2.62469	2.90151	3.86971	3.12083	5.38604	2.37987	4.28704	4.35662	3.50328	3.24678	3.15372	2.58717	3.44912	3.65593	4.11706	3.84811	4.39534	5.1118	4.3937	3.72294	4.36138	7.85955	4.2255	3.81415	4.11334	3.68731	6.0103	3.44434	3.90581	3.62214	4.26256	3.83037	4.21354	4.64886	4.10315	3.46725	2.52515	3.89108	2.37833	2.95649	3.42538	3.84396	3.56585	3.29194	3.9488
108	diethanolammonium	13.4481	21.6672	8.92514	5.59665	31.0134	13.3829	56.9266	10.4298	3.74208	20.289	17.2404	8.1726	6.35274	7.10373	6.99327	8.9311	19.2536	19.3627	12.4656	66.6881	14.0595	13.4403	28.675	17.661	46.1838	20.3273	17.065	26.3142	11.838	81.0676	6.39085	35.8845	12.509	26.4802	19.3496	32.6912	51.2608	12.8019	10.5529	13.5509	14.4575	6.55004	8.95581	8.6415	45.9123	13.9894	15.2454	22.602
109	di-ethyl-di-isopropylammonium	2.81512	2.46551	2.52416	2.77804	2.68175	2.46374	2.48128	4.00572	2.03922	3.72361	4.22595	2.86181	3.04492	2.66095	2.53005	3.19227	1.44671	3.28294	1.4109	3.6632	3.74212	3.39277	2.49119	3.08841	4.29862	2.64721	3.02604	3.0182	2.79128	4.02664	3.75586	2.01049	3.20219	2.42962	2.88964	2.88313	2.68704	3.45724	2.95049	2.55935	2.84162	2.48028	2.56361	3.20759	2.50081	2.60668	2.60435	2.77159
110	diethyl-methylsulfonium	4.02125	3.85126	3.73987	3.64861	4.40231	3.87523	4.16252	5.70792	2.36922	5.41541	6.04072	3.64605	3.49869	3.41776	3.48017	3.96908	2.06244	4.96512	1.89282	5.84796	5.82595	5.08846	4.15795	4.89636	6.09794	4.22975	4.46298	4.70546	4.00992	6.40572	4.63001	2.92451	4.43517	3.73322	4.31729	4.49365	4.09692	4.7854	3.92235	3.98741	4.33036	3.41573	3.52092	3.94822	4.04293	3.92549	4.03224	4.38357
111	dimethylethanolammonium	8.05453	6.84635	8.24818	5.31527	18.5644	7.20869	17.078	7.99958	3.03022	12.445	13.088	5.62105	4.86477	5.22761	5.98155	6.43797	2.94869	11.0911	2.17748	24.8911	9.42801	8.88976	12.783	9.81884	10.7704	9.02166	9.75118	12.2227	7.27584	17.9623	6.16478	5.67454	8.68483	8.23474	9.93535	12.1873	9.76164	8.58371	6.86161	11.7107	8.78513	5.80615	6.79753	6.33941	12.6055	7.95222	9.99366	11.2109
112	dimethyl-phenylsulfonium	4.34478	4.81045	3.17636	3.19706	4.55527	4.36701	5.04134	5.81701	2.41671	5.65905	5.80753	3.36489	3.15961	3.52016	2.95729	3.62545	3.14534	5.27642	2.9069	6.66278	6.04385	5.38022	4.97913	5.38685	7.66274	4.9804	4.82429	5.36072	3.88607	8.11052	4.19499	4.25965	4.06554	4.77623	4.82349	5.40072	5.60023	4.90765	3.69358	3.57082	4.65372	2.82346	3.74715	3.58177	5.19597	4.38124	4.39909	4.67313
113	dodecyl-dimethyl-3-sulfopropylammonium	5.51638	7.68548	3.53402	3.35134	4.49719	5.52824	5.43495	6.25227	2.91181	5.6387	5.25155	4.40988	3.86014	4.01378	3.62688	4.34876	7.41074	6.15156	8.22087	6.09271	6.79031	6.36614	5.38305	6.75794	10.4805	6.96969	5.85996	6.47317	5.0136	8.57572	3.84514	7.18424	4.78546	7.50745	5.99725	6.71528	7.39198	5.7142	4.64174	3.811	5.21053	3.40312	3.75195	4.248	5.68511	5.51419	4.44829	5.76508
114	ethyl-dimethyl-2-methoxyethylammonium	3.49045	3.41759	3.01656	3.13688	3.44122	3.2248	3.32877	4.88727	2.19109	4.53651	4.95629	3.19634	3.20228	3.0147	2.93307	3.51704	2.02961	4.14371	1.9541	4.72463	4.8251	4.29387	3.3279	4.08809	5.47806	3.58204	3.82816	3.94542	3.356	5.31195	4.09306	2.72339	3.73512	3.32709	3.73006	3.80014	3.62077	4.14114	3.37111	3.1463	3.57401	2.86682	2.97821	3.50546	3.37196	3.33226	3.23409	3.57553
115	ethyl-dimethyl-propylammonium	3.40719	3.27156	2.90267	3.01045	3.32174	3.08664	3.23155	4.81171	2.14677	4.42487	4.86898	3.16759	3.19877	2.9439	2.82228	3.47342	1.9228	4.03405	1.8694	4.63045	4.70872	4.18767	3.15105	3.94751	5.48305	3.44492	3.69023	3.82573	3.28517	5.27892	3.95838	2.6419	3.64188	3.18511	3.579	3.6909	3.53152	4.05482	3.33015	3.02954	3.44195	2.76287	2.82912	3.46746	3.22661	3.19779	3.06297	3.46074
116	ethyl-phenyl-methylsulfonium	3.68303	4.18687	2.75569	2.91335	3.53885	3.7608	3.75697	5.23249	2.30322	4.73808	4.92725	3.16909	3.04834	3.1915	2.69423	3.36538	2.83498	4.37268	2.77097	5.09819	5.21865	4.57523	3.93718	4.49983	6.72497	4.14818	4.03026	4.33793	3.47378	6.3489	3.86431	3.55754	3.62742	3.96302	3.99141	4.36217	4.51092	4.2595	3.34707	2.97053	3.97251	2.56538	3.24885	3.34071	4.06025	3.6787	3.61905	3.91233
117	guanidinium	18.0622	24.0156	1.11145	1.03834	2.99937	14.3526	16.9157	9.05632	3.16861	33.2817	19.7155	5.53515	5.34404	8.03352	1.60203	8.04384	77.7101	26.4589	16.3384	67.142	13.6054	18.1122	23.6712	26.175	186.439	34.6278	23.886	44.0133	9.60445	415.568	1.45616	174.225	7.37709	68.8508	29.7184	69.11	230.615	15.8913	11.4224	1.40877	15.8096	1.2434	3.8703	7.5392	38.9338	20.2406	9.01872	16.7545
118	heptyltrimethylammonium	3.94009	5.13554	2.75808	2.8137	3.39953	3.97432	3.80213	5.40289	2.28438	4.67366	4.66747	3.43015	3.28686	3.14939	2.76617	3.57441	3.95573	4.56585	4.18474	5.07647	5.46269	4.80239	3.80991	4.82734	8.3123	4.67536	4.27852	4.63178	3.72031	6.90649	3.56782	4.49627	3.72358	4.88321	4.27368	4.79572	5.24104	4.40606	3.57154	2.92228	3.94797	2.6511	2.84792	3.52745	4.16259	3.85064	3.25124	4.15601
119	hexamethylguanidinium	1.96292	1.10579	2.01214	2.45761	1.87754	1.37344	1.53898	2.32337	1.85878	2.74067	3.32921	2.29269	2.83276	2.18245	2.09091	2.76526	0.73422	2.15337	0.652048	2.49428	1.94075	2.03099	1.58318	1.71856	2.42305	1.42056	2.03669	1.88005	1.91269	2.38577	3.46548	1.15298	2.50534	1.34559	1.90459	1.7813	1.53823	2.46474	2.32975	1.93795	1.84539	2.07925	2.17087	2.83057	1.56874	1.68574	1.94548	1.69073
120	methyl-trioctyl-ammonium	3.13267	3.67768	3.00227	3.22461	3.02193	3.22884	2.98266	4.09403	2.55877	3.61266	4.01929	3.63967	3.71372	3.07453	3.14314	3.72538	2.67157	3.45373	2.95506	3.87595	3.77436	3.48494	3.01527	3.4367	5.29984	3.34501	3.28987	3.41424	3.48164	4.26181	3.90804	3.10001	3.6915	3.39548	3.2762	3.4759	3.65679	3.53832	3.49775	2.97909	3.38484	3.07588	2.93342	3.76016	3.10128	3.07065	2.97154	3.51769
121	n-(3-hydroxypropyl)pyridinium	5.09091	5.54764	4.03503	4.11559	5.59582	5.10657	5.77125	6.51083	2.71591	6.77765	7.19974	3.97416	3.71696	4.07436	3.75849	4.40267	3.80227	6.38946	3.32663	8.17403	6.91269	6.20649	6.42673	6.31123	8.76462	5.88472	5.76037	6.54218	4.58651	9.59788	5.46681	4.96541	5.14928	5.6667	5.75689	6.53851	6.50651	5.8236	4.41572	4.48813	5.58969	3.59074	4.98353	4.36788	6.42912	5.17328	5.87119	5.53321
122	n-(3-sulfopropyl)pyridinium	8.88746	10.9974	7.257	5.90277	14.6541	8.67475	19.1116	7.22136	3.36187	12.3067	11.5817	5.30342	4.73415	5.65034	5.86055	6.2283	10.15	11.2513	7.89531	23.1836	8.8378	8.8104	15.293	10.4088	19.0135	11.0715	10.4128	13.4505	7.07406	26.3578	6.84453	15.1449	8.082	12.885	11.241	15.1568	18.8915	8.53015	6.54799	9.23941	9.45131	5.75275	8.14365	6.16325	18.54	9.12175	11.1117	11.2953
123	n-butyl-isoquinolinium	3.30582	4.22821	2.20435	2.51356	2.71138	3.50932	2.87933	4.90547	2.25088	4.07592	4.15272	3.01074	2.92424	3.00669	2.31409	3.10625	3.15049	3.83257	3.24844	4.11007	4.69231	4.08275	3.50055	4.03309	6.7205	3.81379	3.56621	3.85872	3.18314	5.50649	3.43131	3.49827	3.22535	3.87386	3.57287	3.94587	4.19703	3.84016	3.06596	2.31143	3.59362	2.14567	2.98694	3.10116	3.59821	3.33825	3.21414	3.44967
124	n-butyl-n-propyl-n,n-dimethylammonium	3.37624	3.94147	2.63333	2.75387	3.05144	3.25596	3.1834	4.76499	2.16373	4.19777	4.40825	3.20467	3.19159	2.89316	2.64503	3.38865	2.70118	3.90258	2.82866	4.42906	4.63663	4.08115	3.14879	3.96726	6.59912	3.6771	3.62892	3.83759	3.30871	5.5848	3.57743	3.29469	3.47309	3.693	3.58701	3.85345	4.05398	3.90357	3.2842	2.73906	3.42497	2.55978	2.64787	3.37664	3.35912	3.22043	2.88272	3.53422
125	n-hexyl-n,n,n-triethylammonium	2.82528	3.00744	2.39828	2.63365	2.57971	2.62814	2.5592	3.75028	2.11388	3.54318	3.83632	2.95556	3.12707	2.64865	2.47332	3.1853	2.17038	3.16455	2.27107	3.64646	3.46227	3.18851	2.60566	3.05465	5.20631	2.85533	2.98593	3.08468	2.84751	4.31465	3.44419	2.67035	3.11673	2.91137	2.95197	3.11919	3.23509	3.26959	2.95611	2.4235	2.86639	2.40348	2.48531	3.20422	2.75235	2.65551	2.54582	2.91277
126	n,n,n,n,n-pentamethyl-n-isopropyl-guanidinium	1.97479	1.22379	2.00359	2.40752	1.92554	1.43187	1.6448	2.25735	1.87466	2.74454	3.26114	2.30569	2.83705	2.18309	2.07632	2.75187	0.893276	2.15863	0.809776	2.61659	1.88361	1.9936	1.67038	1.73558	2.6916	1.48281	2.05216	1.93082	1.93092	2.58408	3.34943	1.34841	2.48872	1.48123	1.93645	1.88666	1.7387	2.42349	2.33046	1.94597	1.8687	2.0631	2.16596	2.81724	1.70504	1.71117	1.9681	1.76623
127	n,n,n,n,n-pentamethyl-n-propyl-guanidinium	2.0319	1.27987	2.05862	2.4509	1.98566	1.46468	1.71137	2.25675	1.89826	2.80232	3.30556	2.35666	2.89204	2.20865	2.12929	2.80616	0.955874	2.19651	0.867964	2.70516	1.89078	2.01464	1.72174	1.77385	2.81234	1.5476	2.10243	2.01464	1.97595	2.68213	3.37858	1.42978	2.54142	1.56257	2.0191	1.97641	1.82581	2.4517	2.3792	2.00198	1.91798	2.11879	2.18996	2.87251	1.77365	1.76664	2.00372	1.82305
128	n,n,n,n-tetramethyl-n-ethylguanidinium	2.38036	1.67193	2.1674	2.49943	2.22466	1.8905	1.97079	2.97835	2.06431	3.31265	3.83527	2.75428	3.02624	2.5341	2.34232	3.07276	1.13196	2.67012	1.02314	3.16454	2.54814	2.5433	2.12983	2.25222	3.61054	1.94309	2.50975	2.43512	2.42513	3.32838	3.43235	1.65045	2.96187	1.88382	2.39885	2.37164	2.2205	2.92436	2.73025	2.15831	2.42023	2.18945	2.45564	3.09495	2.15855	2.12803	2.37765	2.27066
129	octyltrimethylammonium	3.90544	5.21831	2.72102	2.802	3.28876	3.9469	3.66074	5.32487	2.30866	4.54656	4.53622	3.45704	3.3119	3.12582	2.76166	3.55301	4.05842	4.47625	4.38471	4.86987	5.37104	4.73024	3.73806	4.78164	8.22135	4.6534	4.19031	4.55156	3.72236	6.63443	3.53733	4.47653	3.69567	4.8355	4.22307	4.67592	5.15059	4.33902	3.56217	2.86126	3.9226	2.64059	2.83048	3.52738	4.05477	3.8078	3.2064	4.12294
130	o-ethyl-n,n,n,n-tetramethylisouronium	2.31452	1.56986	2.25131	2.68571	2.233	1.79944	1.89764	2.8932	1.96938	3.15801	3.74791	2.48478	2.91237	2.4125	2.31072	2.93817	1.02539	2.59166	0.920314	3.00895	2.55995	2.51594	2.04123	2.20844	3.0017	1.85899	2.43343	2.33276	2.23712	2.98154	3.71997	1.50203	2.79678	1.73312	2.29833	2.2192	1.98	2.85051	2.56284	2.21485	2.26314	2.2676	2.50744	2.99886	2.02279	2.05933	2.35885	2.1042
131	o-methyl-n,n,n,n-tetramethylisouronium	2.40098	1.50436	2.42095	2.90871	2.33178	1.84872	1.8902	3.12468	1.99803	3.3155	4.04438	2.55922	2.97222	2.50242	2.47345	3.05205	0.871962	2.74186	0.765694	3.03332	2.80038	2.70873	2.07667	2.32892	2.76286	1.87841	2.54619	2.3868	2.3364	2.87145	4.04986	1.32756	2.97173	1.64346	2.35776	2.19669	1.83055	3.03146	2.66711	2.36756	2.36551	2.43178	2.6824	3.11628	1.9666	2.13554	2.51283	2.15063
132	pyridinium	7.86696	9.12378	3.77167	3.408	12.6189	8.03331	16.4566	8.16514	2.9897	12.9397	12.5	4.53815	4.24684	5.24353	3.24983	5.51277	5.76	10.9858	3.62928	30.5017	9.73185	8.89611	16.6185	10.2766	18.0309	10.3987	9.66327	13.2921	6.00096	32.0863	4.73906	11.2987	6.58895	11.3066	10.3514	14.9173	18.2992	8.24019	5.96461	5.45246	9.06122	2.87987	7.46387	5.46148	20.0322	8.45467	11.3055	9.39655
133	s-ethyl-n,n,n,n-tetramethylisothiouronium	2.35895	1.69967	2.31837	2.70265	2.31785	1.87888	2.02165	2.90263	2.00485	3.23798	3.78901	2.59849	3.01212	2.45448	2.37461	3.02243	1.14527	2.63016	1.05282	3.12978	2.57633	2.53537	2.11074	2.26501	3.27984	1.95216	2.489	2.41679	2.342	3.1833	3.6626	1.65699	2.86603	1.86881	2.37313	2.33724	2.14696	2.85587	2.66207	2.28814	2.33149	2.33741	2.48977	3.08185	2.12499	2.12376	2.3788	2.22042
134	tetrabutyl-phosphonium	2.689	2.82495	2.4994	2.72249	2.53805	2.52939	2.48657	3.45238	2.19214	3.31323	3.67193	3.08066	3.27997	2.65209	2.59199	3.26726	1.99348	2.95724	2.19255	3.43493	3.08822	2.92091	2.40299	2.81604	4.79603	2.68782	2.81998	2.89022	2.85738	3.86771	3.46731	2.5012	3.14814	2.77401	2.79501	2.94602	3.05294	3.08547	2.99363	2.48412	2.78454	2.55595	2.43	3.29594	2.52155	2.54184	2.42126	2.85659
135	tetradecyltrimethylammonium	3.79673	5.37769	2.76121	2.89608	3.11122	4.07832	3.37104	5.28334	2.46503	4.16262	4.21916	3.64511	3.46129	3.19737	2.88978	3.62704	4.12609	4.25716	4.71937	4.33575	5.25895	4.61472	3.61214	4.67126	7.48325	4.62401	4.01438	4.30134	3.84717	5.68433	3.55217	4.23963	3.72877	4.7131	4.03538	4.39267	4.78317	4.20745	3.6293	2.83605	3.93245	2.75348	2.88926	3.60872	3.7692	3.78413	3.18395	4.12768
136	tetra-ethylammonium	2.73052	2.35864	2.47241	2.73589	2.59544	2.36034	2.38941	3.8311	2.02088	3.61598	4.11705	2.82137	3.03126	2.61033	2.48716	3.15406	1.40304	3.15813	1.37872	3.54955	3.54283	3.23935	2.38331	2.94237	4.19812	2.53004	2.91541	2.89307	2.71533	3.88533	3.69633	1.95679	3.13175	2.34172	2.78584	2.7805	2.60354	3.3466	2.89455	2.49454	2.74092	2.44243	2.49322	3.17264	2.40516	2.5104	2.50853	2.67675
137	tetra-methylammonium	4.56768	2.09505	6.07987	4.80957	5.89545	3.57974	3.74999	5.92069	2.3646	6.55463	8.57026	3.70194	3.64742	3.7026	4.65108	4.4567	0.556989	5.89921	0.45472	5.7485	6.21647	5.78932	3.86881	5.25113	2.72627	3.76881	5.18614	4.98586	4.21778	3.95413	5.77432	1.09231	5.50108	2.4463	4.74359	3.95913	2.04429	5.61537	4.30286	6.6008	4.74481	4.75889	4.41621	4.45718	2.69925	4.22349	5.17693	4.40641
138	tetra-n-butylammonium	2.68036	2.76894	2.49173	2.71916	2.52601	2.49885	2.46549	3.42263	2.18445	3.30257	3.668	3.07316	3.27897	2.64119	2.58728	3.25929	1.9518	2.94803	2.12759	3.41902	3.05701	2.89537	2.38745	2.78181	4.76099	2.65088	2.8041	2.87661	2.84016	3.83834	3.47003	2.46395	3.14278	2.71769	2.78556	2.91727	3.01404	3.079	2.98456	2.47489	2.76967	2.54932	2.42694	3.29337	2.50383	2.51783	2.41227	2.83022
139	tetrapropylammonium	2.58791	2.56759	2.31958	2.54334	2.40143	2.3413	2.33648	3.4309	2.05148	3.30337	3.64522	2.8831	3.09656	2.52493	2.39258	3.10851	1.74472	2.87495	1.87084	3.34218	3.06282	2.87085	2.25504	2.70276	4.6935	2.50815	2.72432	2.76854	2.67811	3.83801	3.33807	2.26991	2.98628	2.5443	2.67454	2.7832	2.84014	3.03671	2.83759	2.31975	2.63236	2.35121	2.28626	3.12624	2.37208	2.40234	2.28082	2.66245
140	tributylmethylammonium	2.9573	3.4833	2.47481	2.65892	2.65741	2.90115	2.705	4.06401	2.17693	3.63201	3.87432	3.15852	3.22625	2.74158	2.56428	3.29197	2.46528	3.31572	2.73633	3.74064	3.77199	3.40152	2.70097	3.31893	5.75873	3.16354	3.13284	3.26042	3.08484	4.55745	3.41034	2.92636	3.25097	3.23691	3.11723	3.32308	3.53241	3.40618	3.10901	2.50359	3.06419	2.48944	2.47203	3.29737	2.85248	2.83179	2.56969	3.17855
141	triethylheptylammonium	2.85137	3.02938	2.40866	2.65402	2.57773	2.67694	2.55832	3.72544	2.14259	3.51853	3.80562	2.97858	3.15496	2.69003	2.49553	3.19902	2.24926	3.16148	2.3572	3.62736	3.43731	3.17388	2.635	3.05879	5.22818	2.87283	3.01034	3.11265	2.86399	4.28212	3.45304	2.72402	3.12763	2.98528	2.96146	3.17442	3.26314	3.26792	2.97112	2.42823	2.91121	2.42223	2.51768	3.22507	2.77911	2.6898	2.57349	2.92889
142	triethyloctylammonium	2.88263	3.12744	2.44687	2.69072	2.60811	2.7313	2.59713	3.74472	2.17251	3.52506	3.81039	3.03335	3.20033	2.71144	2.54134	3.25036	2.34781	3.17723	2.48448	3.65274	3.46319	3.1952	2.6802	3.0907	5.30258	2.94357	3.02829	3.11827	2.91901	4.30592	3.47517	2.80748	3.16995	3.0446	2.99741	3.22839	3.33875	3.28232	3.0147	2.46334	2.94634	2.46643	2.54843	3.26736	2.82547	2.73409	2.60955	2.99105
143	triethylpentylammonium	2.76363	2.82418	2.35515	2.60412	2.5314	2.53264	2.48011	3.69737	2.07959	3.50143	3.82812	2.87831	3.07417	2.60527	2.42209	3.12921	1.98794	3.10482	2.04455	3.58111	3.38908	3.13372	2.52977	2.97185	5.00278	2.73107	2.93311	2.99082	2.76043	4.1937	3.44437	2.50149	3.0604	2.76763	2.87847	3.0207	3.07233	3.23253	2.89364	2.37975	2.79955	2.35554	2.46024	3.15442	2.65981	2.5833	2.50397	2.80376
144	triethylsulfonium	3.26115	3.19412	2.9122	3.11475	3.23246	3.09766	3.05475	4.73277	2.22242	4.33853	4.84442	3.21935	3.2603	3.00081	2.88553	3.51134	1.88173	3.8863	1.79834	4.40213	4.58668	4.03424	3.19841	3.78437	5.29131	3.29939	3.54976	3.65879	3.31281	5.0058	4.11366	2.51146	3.67315	3.01544	3.42497	3.51775	3.34062	3.94082	3.34848	3.00281	3.46885	2.80238	3.00399	3.51665	3.17544	3.13897	3.20311	3.42561
145	trihexyl-tetradecyl-phosphonium	2.99796	2.99657	3.31441	3.56822	3.19392	2.87855	3.03713	3.51154	2.71289	3.52404	4.09423	3.69398	3.95114	3.12869	3.41424	3.91321	2.27298	3.27733	2.40713	3.89724	3.15272	3.09588	2.89599	3.0298	4.50994	2.93537	3.14414	3.22608	3.36658	3.9112	4.2499	2.84753	3.79792	3.02225	3.12214	3.28392	3.37803	3.38247	3.55514	3.24895	3.2211	3.42083	3.11143	3.96829	2.98648	2.89121	3.03117	3.32259
146	triisobutyl-methyl-phosphonium	2.80763	3.33452	2.38749	2.57727	2.523	2.77553	2.54871	3.98431	2.11928	3.46025	3.73383	3.07	3.16277	2.66263	2.47494	3.20383	2.15741	3.13299	2.48126	3.5327	3.67305	3.25868	2.48057	3.15404	5.51847	2.98165	2.9512	3.07015	2.95348	4.25973	3.33932	2.64155	3.13124	3.01073	2.92336	3.12217	3.27386	3.24472	2.9931	2.40444	2.92722	2.41403	2.35567	3.20569	2.61112	2.6795	2.40621	3.00936
147	trimethylethylammonium	3.90011	2.58707	4.09249	3.92825	4.35753	3.26745	3.52071	5.40016	2.25014	5.3383	6.45016	3.39968	3.40313	3.30407	3.63828	3.92937	1.02262	4.86244	0.896567	5.2135	5.47679	4.96106	3.48442	4.53177	3.8609	3.54925	4.33159	4.30318	3.67969	4.6667	5.01548	1.70976	4.46266	2.73325	4.05487	3.76713	2.72511	4.79643	3.766	4.29781	3.98599	3.65347	3.55563	3.9269	3.02686	3.63248	3.93409	3.81229
148	hexyltrimethylammonium	3.93788	4.88622	2.82525	2.86636	3.50808	3.84568	3.87598	5.34203	2.25935	4.76509	4.81121	3.39666	3.28062	3.12894	2.79741	3.56445	3.61491	4.5806	3.72399	5.24155	5.40744	4.77476	3.81331	4.79128	8.0293	4.53565	4.26196	4.62746	3.68009	6.95533	3.6576	4.29845	3.75407	4.65183	4.2664	4.7446	5.13148	4.41485	3.56343	3.00553	3.93206	2.69256	2.87609	3.54304	4.17589	3.8092	3.28363	4.12079
[truncated: 4 more columns]
